# To composite or replicate: how sampling method and protocol differences alter stream bioassessment metrics

Lusha Tronstad<sup>1</sup>, Oliver Wilmot<sup>1</sup>, Darren Thornbrugh<sup>2</sup> and Scott Hotaling<sup>3</sup>

## **Affiliations:**

<sup>1</sup> Wyoming Natural Diversity Database, University of Wyoming, Laramie, Wyoming

<sup>2</sup> Northern Great Plains Inventory and Monitoring Program, National Park Service, Rapid City, South Dakota

<sup>3</sup> School of Biological Sciences, Washington State University, Pullman, Washington

**Correspondence:** Lusha Tronstad, Wyoming Natural Diversity Database, University of Wyoming, 1000 E. University Ave., Laramie, WY 82071 USA, 307-766-3115, [tronstad@uwyo.edu](mailto:tronstad@uwyo.edu)

**Running head:** Sampling method and handling alters bioassessment metrics

## **Abstract**

Aquatic invertebrates are excellent indicators of ecosystem quality; however, choosing a sampling method can be difficult. Each method and associated protocol has advantages and disadvantages, and finding the approach that minimizes biases yet fulfills management objectives is crucial. To test the effects of both sampling methods and sample handling – i.e., to composite samples or leave them as replicates – we collected aquatic invertebrates from the Niobrara River at Agate Fossil Beds National Monument, Nebraska using three methods and two sample handling protocols. We compared aquatic invertebrate assemblages collected with a Hester-Dendy multi-plate sampler, Hess sampler and a D-frame dipnet. We calculated six common bioassessment metrics from composite (combined) and replicate (separate) samples. Hess samples contained the highest taxonomic richness (capturing 77% of all taxa observed) and dipnet samples the least (47%). Hester-Dendy samples had the greatest proportion of Ephemeroptera, and Ephemeroptera, Plecoptera and Trichoptera (EPT). Dipnet samples had the lowest evenness values. In terms of sample handling, composite samples had inflated richness, diversity and evenness compared to replicate samples, but bioassessment metrics calculated from proportions or averages (i.e. Hilsenhoff's Biotic Index and the proportion of EPT taxa) did not differ between them. The proportion of invertebrate groups from composite samples were not statistically different among sampling methods, but several groups differed between replicate samples collected by different methods. Ultimately, we recommend collecting replicate samples with a Hess sampler when the goal of the study is to detect ecosystem change, among locations or differences in variables of interest.

**Keywords** aquatic invertebrates, Hess, Hester-Dendy, dipnet, method comparison, stream monitoring, bioassessment, stream ecology

## 1 Introduction

2 Aquatic invertebrates have been used to monitor ecosystem quality for over 150 years (Cairns  
3 and Pratt 1993), largely because they have several characteristics that make them ideal for the  
4 task. Aquatic invertebrates are relatively long lived (weeks to >100 years, Rosenberg and Resh  
5 1993a) and unlike water samples that are collected periodically, invertebrates are permanent  
6 stream residents and therefore their presence or absence reflects long-term conditions at a site.  
7 For instance, water samples may miss discrete, short-lived discharges of pollution, but aquatic  
8 invertebrate communities will respond to such an event (Rosenberg and Resh 1993b).  
9 Furthermore, aquatic invertebrates are relatively sedentary, diverse and are inexpensive to collect  
10 and identify. Most importantly, lower ecosystem quality in a stream can increase mortality and  
11 decrease reproduction, survival and fitness of sensitive aquatic invertebrates (e.g.,  
12 Ephemeroptera) while others are more tolerant to disturbances (e.g., Diptera; Johnson et al.  
13 1993; Barbour et al. 1999). Changes in the diversity or assemblage structure of aquatic  
14 invertebrates can inform managers of stream ecosystem quality (Rosenberg and Resh 1993b).

15 Choosing a sampling method for aquatic invertebrate monitoring is difficult and depends  
16 on many variables. All approaches have advantages and disadvantages (e.g., cost to implement,  
17 time, bias towards specific taxa or life histories; e.g., Macanowicz et al. 2013, Tronstad and  
18 Hotaling, 2017). Therefore, identifying a method that is cost-effective, minimizes bias and  
19 fulfills management objectives is critical. Bioassessment studies use a variety of sampling  
20 methods, including kicknets, fixed-area samplers (e.g., Hess sampler), artificial substrates (e.g.,  
21 Hester-Dendy samplers) and dipnets (Carter and Resh 2001). However, some sampling methods  
22 are not well-suited to all stream habitats. For example, artificial substrates (e.g., Hester-Dendy  
23 plates) are ideal for large, deep rivers that are otherwise difficult to sample (De Pauw et al.  
24 1986). However, artificial substrates rely on colonization and therefore, do not represent natural  
25 assemblages or densities and can be biased towards certain insect orders (Letovsky et al. 2012).  
26 The type of information being collected also matters. For example, qualitative data may be  
27 sufficient if the study is estimating ecosystem health to meet federal standards, but more rigorous  
28 quantitative sampling is needed to assess change over time (e.g., Slavik et al. 2004). Qualitative  
29 samples only report proportional data, while fixed area samplers provide quantitative information  
30 on the density and biomass for each taxon in the assemblage.

31 Laboratory protocols can alter the taxa identified and the bioassessment metrics  
32 calculated. Previous studies (e.g., Vinson & Hawkins 1996) have investigated what type of  
33 subsampling method is best for bioassessment studies to minimize cost and produce reliable  
34 results. The two main types of subsampling – fixed area (e.g., 25% of sample) and fixed count  
35 (e.g., 300 individuals; e.g., King and Richardson 2002) – have been compared for many data  
36 types (e.g., Vinson & Hawkins 1996). However, the question of how replicate samples should be  
37 handled i.e., whether combined into composites or processed as replicates, remains largely  
38 unaddressed. Most bioassessment protocols (e.g., US EPA) direct users to composite samples in  
39 the field. That is, individual samples are combined into one large sample which is assumed to  
40 homogenize variance (Carey and Keough 2002); however, we are not aware of any studies  
41 investigating that assumption. Alternatively, replicate samples can be kept and analyzed  
42 separately with potential for added insight at relatively little additional cost. Replicate samples  
43 have rarely been integrated into bioassessment methods but a few exceptions occur. DiFranco

44 (2014) recommends collecting three replicate samples in wetland habitats. Lazorchak et al  
45 (1998) and Hering et al. (2004) straddle a grey area between replicate and composite samples by  
46 directing users to pool microhabitat samples (e.g., pools and riffles) so that variance among  
47 habitats is estimated.

48 The National Park Service (NPS) has been monitoring aquatic invertebrates in the  
49 Niobrara River at Agate Fossil Beds National Monument since 1989 using Hester-Dendy  
50 samplers. However, due to the inherent complications of collecting samples using artificial  
51 substrates and an inability to make direct comparisons to other streams, a change in monitoring  
52 approach is under consideration. In this study, we used the opportunity to address an applied  
53 issue in stream biomonitoring and answer three questions: 1.) How does sampling method affect  
54 the invertebrate assemblage collected in the Niobrara River? 2.) How do the corresponding  
55 bioassessment metrics compare among sampling methods? And, 3.) to what degree do composite  
56 vs. replicate samples alter the assemblage and bioassessment metrics?

57

## 58 **Materials and methods**

### 59 *Study area*

60 The headwaters of the Niobrara River are located near Lusk, Wyoming and the river flows  
61 eastward into Nebraska and eventually into the Missouri River near Niobrara, Nebraska (Fig. 1).  
62 The Niobrara River Basin covers 32,600 km<sup>2</sup> of which the majority is grassland in northern  
63 Nebraska (Galat et al. 2005). Over 95% of the land within the basin is used for agriculture. The  
64 Niobrara River flows through Agate Fossil Beds National Monument in western Nebraska about  
65 23 km from the Wyoming border. Here, the Niobrara River is a low order stream flowing  
66 through grassland. Agate Fossil Beds National Monument includes ~10.9 km<sup>2</sup> in a valley bottom  
67 and ~18 km of river flows through the park (Fig. 1). The river's riparian vegetation is dominated  
68 by cattails (*Typha* sp.) and the invasive yellow flag iris (*Iris pseudacorus*) and its substrate is  
69 predominantly fine particles (e.g., sand, silt and clay). Currently, northern pike (*Esox lucius*),  
70 white suckers (*Catostomus commersonii*) and green sunfish (*Lepomis cyanellus*) inhabit the river  
71 within the park (Spurgeon et al. 2014); however, nine other fish species were collected at Agate  
72 Fossil Beds National Monument prior to 1990 (Spurgeon et al. 2014).

73 We sampled three long-term monitoring sites along the Niobrara River (Fig. 1; Tronstad  
74 & Hotaling, 2017) in 2016. We deployed Hester-Dendy samplers in mid-July and returned to  
75 collect them as well as Hess and dipnet samples in mid-August (see below). The most upstream  
76 site (Agate Springs Ranch) is located near the western park boundary. Agate Springs Ranch has  
77 an overstory of plains cottonwood (*Populus deltoides*) and cattails are more abundant than iris.  
78 The central site, Agate Middle, lacks an overstory and has gravel substrate with abundant iris and  
79 cattails surrounding the river. Finally, Agate East is located before the Niobrara River flows out  
80 of the park and is the deepest site with riparian vegetation dominated by iris and a few willows  
81 (*Salix* spp.).

82

### 83 *General measurements*

84 To assess general environmental characteristics of our study sites, we measured a number of  
85 standard variables (e.g., temperature), as well as water quality and clarity, sediment composition,

86 water depth and discharge. We measured dissolved oxygen (percent saturation and mg/L), pH,  
87 water temperature, specific conductivity and oxidation-reduction potential using a Yellow  
88 Springs Instruments (YSI) Professional Plus. The YSI was calibrated on-site before use. We  
89 measured water clarity by estimating the depth at which a Secchi disk disappeared from sight.  
90 The dominant substrate was recorded in the main channel of all sites and where each Hess  
91 sample was taken using soil texture tests (Thien 1979). Clay was defined as fine particles  
92 forming a ribbon after removing water, whereas silt did not form a ribbon. Sand was  
93 characterized by particles 0.06-2 mm in diameter, gravel was 2-64 mm in diameter, cobble was  
94 64-256 mm in diameter, boulders were 25-400 cm in diameter, bedrock was >4 m in diameter  
95 and hardpan/shale was identified by firm, consolidated fine substrate. We recorded the location  
96 of each site using a global positioning system (GPS; Garmin eTrex Vista HCx). Finally, we  
97 estimated stream discharge ( $Q$ ; m<sup>3</sup>/s) by measuring water depth ( $d$ ; m) and velocity ( $v$ ; m/s)  
98 using a Marsh-McBirney Flo-Mate 2000 at 0.3 m intervals across the stream's width ( $w$ ; m) and  
99 summing each interval using Equation 1:

100

101

$$\text{Equation 1: } Q = \sum d_i \times v_i \times w_i$$

102

### 103 *Hester-Dendy sample collection*

104 We deployed seven Hester-Dendy samplers (76 mm x 76 mm, 9 plates, Wildlife Supply  
105 Company) at each site. For each sampler, we strung a rope across the stream between two fixed  
106 posts with evenly spaced loops to separate the Hester-Dendy multiplate samplers. The Hester-  
107 Dendy samplers were suspended in the water column at least 15 cm above the substrate. Debris  
108 dams were cleared weekly and we retrieved the samplers after 30 days of colonization by  
109 approaching the site from downstream, placing a dipnet (150 μm mesh) under it and cutting the  
110 rope. Hester-Dendy samplers were immediately placed in a container with ~80% ethanol and any  
111 organisms in the dipnet were removed and placed in the same container. In the laboratory, we  
112 dismantled and scrubbed the Hester-Dendy samplers to remove invertebrates that colonized the  
113 plates, then we rinsed the samplers through a 212 μm sieve and preserved all specimens in ~80%  
114 ethanol. The middle five Hester-Dendy samples were used for analysis except when one of the  
115 samplers were compromised (e.g., touching the bottom).

116

### 117 *Hess sample collection*

118 We collected five Hess samples (500 μm mesh, 860 cm<sup>2</sup> sampling area, Wildlife Supply  
119 Company) at each site. Samples were taken along the shallower margins of the stream where  
120 emergent vegetation is abundant. We placed the Hess sampler over vegetation to collect  
121 invertebrates living on it and in the surrounding benthic sediment. The vegetation and sediment  
122 were vigorously agitated and invertebrates were captured in the net. Samples were preserved in  
123 80% ethanol and returned to the laboratory for analysis.

124

125 *Dipnet sample collection*

126 We collected dipnet samples along a reach that was 40x the wetted stream width following  
127 standard methods for sampling aquatic invertebrates in wadeable streams (US EPA 2013). We  
128 measured the wetted width at five representative points along the stream and averaged values to  
129 the nearest meter. The average width of the Niobrara River was less than 4 m, so we used a  
130 minimum reach length of 150 m. We sampled invertebrates along 11 evenly-spaced transects that  
131 were 15 m apart using a D-frame net (243  $\mu\text{m}$  mesh, 30.5 x 25.4 cm opening, Wildlife Supply  
132 Company). At each transect, we sampled the right, left and center of the stream systematically.  
133 Multiple habitats were sampled including benthic substrate, woody debris, macrophytes and leaf  
134 packs. All samples were composited and preserve in the field with 95% ethanol.

135 For dipnet sampling, we classified streams into riffle/run or pool/glide habitat and  
136 adjusted our methods for each. We defined a habitat as riffle/run if the current fully extend the  
137 net or a pool/glide if the net did not fully extend. For riffle/run habitats, we placed the net on the  
138 bottom of the stream with the opening facing upstream. We visually defined a sampling area as  
139 one net width wide and long upstream of the opening ( $\sim 30 \times 25$  cm). We first removed any large  
140 organisms (e.g., snails, mussels) from the sampling area and placed them into the net. Next, we  
141 scrubbed all rocks that were golf ball sized ( $\sim 4$  cm) or larger to dislodge organisms, wash them  
142 into the net and placed the scrubbed rocks outside of the sampling area. Finally, we held the net  
143 below the sampling area and disturbed the remaining finer substrate for 30 seconds while the  
144 drift washed into the net. Pool/glide habitats were sampled the same as riffle/run except the net  
145 was repeatedly pulled through the disturbed water just above the substrate to capture organisms  
146 and continuously moved throughout sampling to ensure no organisms escaped the net.

147 After we sampled a transect, we transferred the sample to a sieve bucket (500  $\mu\text{m}$  mesh).  
148 We removed as much gravel as possible and inspected the net for any residual organisms. We  
149 inspected each large object (e.g., rocks or sticks), removed organisms that were attached to them  
150 and discarded the object. For each sampled area, we recorded the dominant substrate size (e.g.,  
151 fine/sand, gravel, coarse, other) and the habitat type (riffle/run or pool/glide).

152

153 *Sample processing – Hester-Dendy and Hess*

154 Invertebrates collected with Hester-Dendy and Hess samplers were sorted from debris in white  
155 trays and identified under a dissecting microscope. We rinsed all samples through a 2 mm sieve  
156 followed by 212  $\mu\text{m}$  (Hester-Dendy) or 500  $\mu\text{m}$  (Hess) sieves to separate larger and smaller  
157 invertebrates. All large invertebrates ( $> 2$  mm) were identified. If invertebrates were visually  
158 numerous in the smaller sieve, we subsampled the contents using the record player method  
159 (Waters 1969). Invertebrates were identified according to Merritt et al. (2008) for insects, and  
160 Thorp and Covich (2010) and Smith (2001) for non-insect invertebrates. Invertebrate tolerance  
161 values were assigned to each taxon from Barbour et al. (1999).

162

163 *Sample processing - Dipnet*

164 We processed dipnet samples following the official EPA protocol (US EPA 2013). We elutriated  
165 all dipnet samples to remove inorganic substrate with a 500  $\mu\text{m}$  mesh sieve. In the laboratory, we  
166 spread the sample evenly over a 30 x 36 cm sorting tray that was divided into 30 numbered grids  
167 (6  $\text{cm}^2$  each). Using a random number generator in R (R Development Core Team 2013), we  
168 selected six of the 30 grids, removed the invertebrates and counted them. If the first six grids did  
169 not contain a minimum of 500 individuals, we randomly selected additional grids until the  
170 minimum threshold was reached. We removed and identified large or rare invertebrates defined  
171 as longer than 1.2 cm (Vinson and Hawkins 1996). All invertebrates were identified to the lowest  
172 taxonomic level possible, typically genus, and we normalized our abundance estimates for each  
173 site based upon the number of grids that were counted.

174

### 175 *Statistical analyses*

176 We used R (R Development Core Team 2013) and the packages *plyr* (Wickham 2011), *Matrix*  
177 (Bates and Maechler 2013), and *vegan* (Oksanen et al. 2013) to calculate invertebrate  
178 abundances, proportions, bioassessment metrics and perform statistical tests. To estimate  
179 ecosystem quality, we calculated six common bioassessment metrics: Hilsenhoff's Biotic Index  
180 (HBI), Ephemeroptera, Plecoptera and Trichoptera (EPT) richness, proportion of EPT taxa  
181 (number of EPT taxa divided by the total number of taxa collected), taxonomic diversity  
182 (Shannon's index), taxonomic richness and taxonomic evenness.

183 We compared invertebrate proportions and bioassessment metrics among sites and  
184 sampling methods with ANOVAs. If sites or methods were significantly different, we used  
185 Tukey's honest significant difference (HSD) to verify which sites or methods differed from one  
186 another with pair-wise comparisons. To compare invertebrate assemblages recovered with  
187 Hester-Dendy and Hess samples to dipnet samples, we electronically composited replicates at  
188 each site. However, to explore how compositing samples affects bioassessment metrics, we also  
189 calculated bioassessment metrics separately for each Hester-Dendy and Hess replicate at each  
190 site.

191 We evaluated differences in the aquatic invertebrate assemblage across sites and  
192 sampling method with non-metric multidimensional scaling (NMDS) implemented in the R  
193 package *vegan* (Oksanen et al. 2013). NMDS provides an ordination-based approach to rank  
194 distances between objects and has been shown to perform well with non-normally distributed  
195 data (Legendre and Legendre 1998). To prepare our data for NMDS analysis, we removed rare  
196 taxa (as defined as any taxon that was unique to a single site+method combination). Next, we  
197 calculated the mean and standard deviation (SD) for each taxon and removed two species which  
198 were present at more than two deviations above the mean. Finally, we removed any taxon  
199 present at less than 0.1% of the overall abundance (after the first two filtering steps were  
200 completed). NMDS analyses were performed using Bray-Curtis distances on composite samples  
201 with default settings. To test whether the assemblages recovered were different depending on  
202 sampling method or site, we performed an analysis of similarities (ANOSIM) with default  
203 settings (including 999 permutations). Next, we investigated differences in multivariate

204 dispersion for each method by calculating the mean distance of each sample to the group's  
205 centroid in multivariate space with the function *betadisper*. We assessed pair-wise differences in  
206 dispersion with a Tukey's HSD. To better visualize taxonomic differences in invertebrate  
207 assemblages collected with each sampling method, we constructed a ternary plot using the R  
208 package *ggtern* (Hamilton 2015). For ternary plot construction, we only removed rare taxa (as  
209 described above) before averaging the abundances of each taxon in composite samples across  
210 sites for each method.

211

## 212 **Results**

### 213 *Environmental variation*

214 Sites were environmentally similar to one another with little variation between our July and  
215 August sampling dates (Table 1). Water temperatures ranged from ~21-24°C. Dissolved oxygen  
216 concentrations were near saturation. Specific conductivity was approximately 350  $\mu\text{S}/\text{cm}$  and pH  
217 was consistently highest at Agate Springs Ranch. Oxidation-reduction potential was highest at  
218 Agate Springs Ranch (169-197 mV) and we measured reducing conditions ( $< 200$  mV) at all  
219 sites. Discharge was higher in August and Agate East had the lowest flow. Agate East was the  
220 deepest site (1.2-1.5 m). Agate Springs Ranch was the narrowest (3-3.8 m) and shallowest (0.5-  
221 0.7 m; Table 1) site. The substrate at all sites was dominated by fine sediment (i.e., clay, sand  
222 and silt) and gravel.

223

### 224 *Community composition*

225 We identified 73 invertebrate taxa representing six phyla (Annelida, Arthropoda, Mollusca,  
226 Nematoda, Nematomorpha and Platyhelminthes) in the Niobrara River when all samplers were  
227 combined (SM A-C). Hester-Dendy samples contained nine taxa not found in Hess samples, 18  
228 taxa not collected with the dipnet and 8 taxa unique to Hester-Dendy samples. Hess samples  
229 contained 30 taxa not collected with Hester-Dendy samplers, 31 taxa not collected with the  
230 dipnet and 21 taxa unique to Hess samples. Dipnet samples included 16 taxa not collected with  
231 Hester-Dendy samplers, 10 taxa not present in Hess samples and 8 taxa unique to dipnet  
232 samples.

233 When composited, proportions of insects (Fig. 2a;  $F = 0.3$ ,  $df = 1$ ,  $p = 0.75$ ) and non-  
234 insects (Fig. 2b;  $F = 0.3$ ,  $df = 1$ ,  $p = 0.75$ ) did not differ among sampling methods. Proportions of  
235 Annelida, Crustacea, Coleoptera, Diptera, Ephemeroptera, Hemiptera, Mollusca, Odonata and  
236 Trichoptera also did not differ when composited ( $p \geq 0.25$ ; Fig. 2). Conversely, when treated as  
237 replicates, the proportion of insects (Fig. 2a;  $F = 4.8$ ,  $df = 1$ ,  $p = 0.04$ ), non-insects (Fig. 2b;  $F =$   
238  $4.8$ ,  $df = 1$ ,  $p = 0.04$ ), Annelida (Fig. 2c;  $F = 11.8$ ,  $df = 1$ ,  $p = 0.002$ ), Ephemeroptera (Fig. 2d;  $F =$   
239  $4.6$ ,  $df = 1$ ,  $p = 0.04$ ), Odonata (Fig. 2e;  $F = 4.6$ ,  $df = 1$ ,  $p = 0.04$ ) and Trichoptera (Fig. 2f;  $F =$   
240  $6.9$ ,  $df = 1$ ,  $p = 0.01$ ) differed between Hester-Dendy and Hess samples. The proportion of  
241 Mollusca ( $F = 3.7$ ,  $df = 1$ ,  $p = 0.065$ ), Crustacea ( $F = 0.43$ ,  $df = 1$ ,  $p = 0.52$ ), Coleoptera ( $F = 0.2$ ,  
242  $df = 1$ ,  $p = 0.65$ ), Diptera ( $F = 0.79$ ,  $df = 1$ ,  $p = 0.38$ ) and Hemiptera ( $F = 2.5$ ,  $df = 1$ ,  $p = 0.13$ )  
243 did not differ between replicate Hester-Dendy and Hess samples.

244 Additionally, NMDS analyses indicated that the sampling methods collected different  
245 aquatic invertebrate assemblages ( $p$ , ANOSIM = 0.008; Fig. 3a), but that overall, assemblages  
246 did not differ among sites ( $p$ , ANOSIM = 0.408; Fig. 3b). While different sampling methods  
247 yielded distinct assemblages, the amount of multivariate space occupied by each method did not  
248 differ ( $p$ , Tukey's HSD  $\geq 0.94$ ). Visualization of the assemblage recovered by each method via  
249 ternary plot highlighted the strong bias towards Hess and Hester-Dendy sampling in terms of  
250 unique taxa (Fig. 4). After filtering rare taxa as described above, only one taxon, *Ceratopogon*, a  
251 genus of Ceratopogonidae, was observed in dipnet samples yet was largely absent elsewhere.  
252 Both Hess (13 taxa) and Hester-Dendy (7 taxa) sampling recovered a number of taxa that were  
253 either rare or completely absent in the results of the other methods. However, some taxa were  
254 relatively equally represented across all three methods including *Anax*, *Collembola*, *Hyallolella* and  
255 Lymnaeidae (Fig. 4).

256

### 257 *Bioassessment metrics*

258 When calculated from composite samples, bioassessment metrics differed among sampling  
259 methods, but most comparisons were not significant without incorporating replicates. Taxonomic  
260 richness (Fig. 5a;  $F = 2.6$ ,  $df = 2$ ,  $p = 0.19$ ), diversity (Fig. 5b;  $F = 4.4$ ,  $df = 2$ ,  $p = 0.10$ ),  
261 evenness (Fig. 5c;  $F = 5.4$ ,  $df = 2$ ,  $p = 0.07$ ) and EPT richness (Fig. 5d;  $F = 3.3$ ,  $df = 2$ ,  $p = 0.14$ )  
262 did not differ among sampling methods. The proportion of EPT taxa (Fig. 5e;  $F = 63$ ,  $df = 2$ ,  $p =$   
263  $0.0009$ ) were highest in Hester-Dendy samples and lowest in Hess samples (Tukey's HSD,  $p <$   
264  $0.05$ ). HBI values (Fig. 5f;  $F = 28$ ,  $df = 2$ ,  $p = 0.005$ ) were lower in Hester-Dendy samples  
265 (Tukey's HSD,  $p < 0.02$ ).

266 Most bioassessment metrics calculated from electronically composited samples were  
267 higher than those estimated from replicate samples. When composited, 40% and 80% more taxa  
268 were observed in Hester-Dendy and Hess samples, respectively, versus replicate samples (Table  
269 2). Similarly, EPT richness was 43% and 83% higher in composited Hester-Dendy and Hess  
270 samples, respectively, versus replicates. Taxonomic diversity was also 82% higher in composited  
271 Hester-Dendy samples and 63% higher in composited Hess samples. Finally, composited Hester-  
272 Dendy and Hess samples had 58% and 54% higher evenness values, respectively. Conversely,  
273 the proportion of EPT taxa and HBI values did not differ between composite and replicate  
274 samples.

275

### 276 *Hester-Dendy sampling*

277 Across all methods and sites, Hester-Dendy samples contained 52% of the total invertebrate  
278 community we observed. Insecta and Crustacea (90% of individuals) were the most abundant  
279 taxa in Hester-Dendy samples. Of the insects, Diptera and Ephemeroptera were the most  
280 abundant followed by Trichoptera and Odonata (SM 1). Hester-Dendy samples from Agate  
281 Middle (909 ind/sample) contained more invertebrates than both Agate Springs Ranch (217  
282 ind/sample) and Agate East (279 ind/sample;  $F = 7.1$ ,  $df = 2$ ,  $p = 0.009$ ; Tukey HSD,  $p < 0.025$ ;  
283 calculated with replicate samples). Taxonomic richness was lowest at Agate Springs Ranch  
284 (Table 2;  $F = 28.7$ ,  $df = 2$ ,  $p < 0.001$ ). Taxonomic diversity ( $F = 0.35$ ,  $df = 2$ ,  $p = 0.71$ ),



285 taxonomic evenness ( $F = 0.25$ ,  $df = 2$ ,  $p = 0.78$ ), EPT richness (Table 2;  $F = 2.1$ ,  $df = 2$ ,  $p = 0.16$ )  
286 and the proportion of EPT taxa did not differ among sites (Table 2;  $F = 1.8$ ,  $df = 2$ ,  $p = 0.2$ ). The  
287 average tolerance value for an invertebrate collected with Hester-Dendy sampling was lowest at  
288 Agate Springs Ranch (HBI; Table 2;  $F = 18.9$ ,  $df = 2$ ,  $p < 0.001$ ; Tukey HSD,  $p \leq 0.05$ ).

### 289 290 *Hess sampling*

291 We collected 77% of all observed taxa with Hess sampling. Overall, Insecta, Crustacea and  
292 Annelida (98% of individuals) were the most numerous groups in Hess samples. Of the insects,  
293 Diptera were most abundant followed by Ephemeroptera, Odonata and Trichoptera (SM 2). Hess  
294 samples from Agate Middle (926 ind/sample) had higher abundances of invertebrates compared  
295 to both Agate East (465 ind/sample) and Agate Springs Ranch (282 ind/sample;  $F = 8.7$ ,  $df = 2$ ,  $p$   
296  $= 0.005$ ; Tukey HSD,  $p \leq 0.035$ ; calculated from replicate samples). Taxonomic richness was  
297 lowest at Agate Springs Ranch (Table 2;  $F = 11.7$ ,  $df = 2$ ,  $p = 0.001$ ; Tukey's HSD,  $p < 0.02$ ),  
298 but taxonomic diversity did not differ among sites (Table 2;  $F = 5.3$ ,  $df = 2$ ,  $p = 0.02$ ).  
299 Taxonomic evenness was highest at Agate Springs Ranch (Table 2;  $F = 14.6$ ,  $df = 2$ ,  $p < 0.001$ ;  
300 Tukey HSD,  $p \leq 0.01$ ). Agate Springs Ranch also had a higher proportion of EPT taxa than both  
301 other sites (Table 2;  $F = 3.8$ ,  $df = 2$ ,  $p = 0.05$ ). Additionally, invertebrates at Agate Springs  
302 Ranch had the lowest mean tolerance value (HBI; Table 2;  $F = 24$ ,  $df = 2$ ,  $p < 0.0001$ ; Tukey's  
303 HSD,  $p < 0.001$ ).

### 304 305 *Dipnet sampling*

306 Of all the invertebrate taxa observed in this study, 47% were found in dipnet samples. Overall,  
307 Insecta and Crustacea (99% of individuals) were the most numerous invertebrates. Within  
308 insects, Diptera were the most abundant order followed by Ephemeroptera, Odonata and  
309 Coleoptera (SM 3). We collected the most individuals from Agate Middle (~2685 ind/sample)  
310 and fewer individuals from Agate East (~1260 ind/sample) and Agate Springs Ranch (~400  
311 ind/sample). Taxonomic richness and diversity were lowest at Agate East (Table 2). Taxonomic  
312 evenness was highest at Agate East (Table 2). Agate Springs Ranch had the highest number of  
313 EPT as well as the highest EPT proportion (Table 2). As a result, invertebrates at Agate Springs  
314 Ranch had the lowest mean tolerance value (HBI). No statistical comparisons among sites are  
315 reported due to the lack of replicates for the dipnet sampling.

### 316 317 **Discussion**

318 Both sampling method and processing (whether replicate or composite) alters the invertebrate  
319 assemblage collected and bioassessment metrics calculated. Hess samples yielded more unique  
320 taxa and the most complete picture of the stream invertebrate assemblage. Hester-Dendy samples  
321 were biased toward EPT taxa and dipnet sampling emphasized the most common taxa and thus  
322 had the lowest evenness values. Compositing samples yields elevated taxonomic richness,  
323 diversity and evenness compared to the same metrics calculated from individual replicates;  
324 however, metrics based on proportions or averaging (e.g., HBI) did not differ. Our results add  
325 another line of evidence that different sampling methods collect different portions of the

326 invertebrate community and care must be taken when choosing an approach. For example, many  
327 studies have compared the aquatic invertebrates captured using different samplers in a variety of  
328 habitats, such as streams, wetlands, vegetation and sink holes (e.g., Macanowics et al. 2013;  
329 Turner and Trexler 1997; Buss and Borges 2008); however, we are unaware of any studies  
330 comparing Hess, Hester-Dendy and dipnet sampling directly. While managers should be aware  
331 of the potential bias of different methods, some approaches may be more useful than others  
332 under certain conditions. For example, funnel traps, dipnets and stovepipe corers captured the  
333 most taxa in emergent vegetation of the Florida Everglades while Hester-Dendy sampling  
334 collected fewer taxa (Turner and Trexler 1997). Similar to the Niobrara River, quantitative  
335 Surber samplers (an analog of Hess sampling) collected 95-98% of taxa in two Australian rivers  
336 where qualitative kicknet samples only captured 63-66% of the community (Gillies et al. 2009).

337 Bioassessment metrics are also influenced by sampling method (e.g., Bouchard et al.  
338 2014), sorting technique (e.g., Nichols and Norris 2006), subsampling method (e.g., Nichols and  
339 Norris 2006; King and Richardson 2002), mesh size (e.g., Battle et al. 2007) and the taxonomic  
340 level specimens are identified to (e.g., King and Richardson 2002; Jones 2008). Despite the fact  
341 that compositing samples is common in stream bioassessment (e.g., US EPA 2013, RIVPACS),  
342 few studies have investigated how compositing samples may alter metrics. We show that  
343 compositing alters bioassessment metrics (e.g., taxonomic richness, diversity and evenness) and  
344 therefore, metrics calculated from composite samples should not be compared to those calculated  
345 from replicate samples. Indeed, only metrics calculated from proportions or averages should be  
346 compared between composite and replicate samples.

347 Composite samples are typically used as a cost-efficient method to assess conditions in  
348 aquatic ecosystems when estimating variance is not critical (Downes 2010). Most bioassessment  
349 protocols (e.g., RIVPACS and US EPA) recommend compositing samples to calculate a single  
350 estimate of metrics per site. Collecting a large composite sample is presumed to homogenize the  
351 variance, and therefore produce a single, reliable value (Carey & Keough 2002; B. Marshall,  
352 personal communication). One study discovered that metrics calculated using composite samples  
353 varied by 30% within a site (B. Marshall, personal communication). Vlek et al. (2006) compared  
354 the ecological quality class (a measure of stream ecosystem health) from bioassessment metrics  
355 calculated with replicate and composite samples, and found that 8% were in different classes  
356 when five replicate samples were collected. In our study, composite samples from all methods  
357 produced a different result for each site using Hilsenhoff's Biotic Index (Hilsenhoff 1987).  
358 Compositing Hester-Dendy samples had the highest ratings (fair to very good) and dipnet samples  
359 the lowest (poor to fair). Bradley and Ormerod (2002) reported that rare taxa were the largest  
360 source of error when sampling streams with kicknets. Another source of error likely lies in  
361 subsampling of large composite samples which may introduce variance compared to replicate  
362 samples. Regardless of the subsampling method (i.e., fixed area or fixed counts), fewer  
363 individuals are removed and analyzed in composite samples versus replicate samples.  
364 Ultimately, more individuals analyzed will always yield more accurate estimates of conditions,  
365 but increasing the number of individuals also requires more resources. More studies designed to  
366 estimate differences between composite and replicate samples and their associated bioassessment  
367 metrics are needed to understand the consequences of sampling designs and when it's  
368 appropriate to use them.

369 Unlike composite samples, replicates enable managers to calculate variance which  
370 provides additional power to estimate differences among variables and/or sites of interest while  
371 simultaneously improving bioassessment accuracy (Quinn and Keough 2002). A key to effective  
372 use of replicate samples lies in identifying the variables for which knowledge of the variance is  
373 valuable, and collecting replicates for them, while also identifying when to composite samples  
374 for other variables to save resources (Downes 2010). Replicate samples are recommended for  
375 monitoring data where statistical power is needed to detect changes over time (e.g., Slavik et al.  
376 2004). Replicates are also necessary when the goal of a study is to detect differences among  
377 variables (e.g., sites, substrate), because replicates provide vital statistical power. For example,  
378 when replicates were composited in our study, we did not detect statistically significant  
379 differences in the proportion of invertebrate groups or the calculated metrics (e.g., taxonomic  
380 richness); however, when replicates for Hester-Dendy and Hess samples were compared, many  
381 groups yielded statistically different results. For best practices in stream biomonitoring, we  
382 recommend collecting replicate samples that are analyzed separately and electronically  
383 composited later if the need arises. While an argument could be made that collecting one  
384 composited sample in the field reduces the number of samples to manage in transit and process,  
385 in our experience, replicate samples are easier to process in the laboratory as they reduce the  
386 amount of material per sample, especially in areas with a lot of organic matter.

387 We also showed that different sampling methods yield very different perspectives on the  
388 aquatic invertebrate community being studied. Previous studies have reported that Hester-Dendy  
389 sampling tends to select for EPT taxa (Canton and Chadwick 1983; Letovsky et al. 2012).  
390 Because EPT richness is a common metric in biomonitoring, Hester-Dendy samples can bias  
391 bioassessment metrics towards lower values, indicating better ecosystem health. Our results  
392 support this as Hester-Dendy samples in the Niobrara River had the largest proportion of  
393 Ephemeroptera, the highest EPT and the largest proportion of EPT taxa. As a result, HBI values  
394 were lowest for Hester-Dendy samples because Ephemeroptera tend to be sensitive taxa with low  
395 tolerance values. Beyond a single season, we have shown that Hess samples collected more taxa  
396 than Hester-Dendy samples across five consecutive years of sampling in the Niobrara River  
397 (Tronstad and Hotaling 2017). Dipnets performed consistently poorer than both Hester-Dendy  
398 and Hess samples in terms of the number of unique taxa recovered. Similarly, Hester-Dendy  
399 samples collected lower taxonomic diversity compared to kicknet samples (McCabe et al. 2012;  
400 Letovsky et al. 2012), sweep nets and stovepipe cores (Turner and Trexler 1997) in other aquatic  
401 ecosystems. Quantitative samplers (e.g., Surber and Hess samplers) collected similar (Buss and  
402 Brges 2008) or more taxa than kicknets (Gillies et al. 2009) and box samplers (O'Connor et al.  
403 2004). In the Niobrara River, Hess samples contained more than twice as many taxa as dipnets at  
404 two of the sites. Thus, our study lends additional support to previous findings that quantitative  
405 sampling (e.g., Hess or Surber) outperforms other methods by collecting more taxa overall, more  
406 unique taxa, and by sampling natural features, a more representative view of the natural  
407 community (Tronstad and Hotaling 2017).

408 Hester-Dendy and Hess samples suggested that invertebrates were fairly evenly  
409 distributed in the sampled assemblage based on taxonomic evenness. We calculated taxonomic  
410 evenness as Shannon's diversity index divided by the  $\log_{10}$  of richness. A value near zero  
411 indicates that the assemblage is dominated by a few taxa whereas a value near one indicates that

412 the abundance of each taxon is similar. Mean richness for composited samples were close to one  
413 for both Hess and Hester-Dendy samples; however, dipnet samples had a mean value of 0.55,  
414 suggesting substantial bias in the assemblage towards high density taxa (Table 1). Specifically,  
415 our dipnet samples had a high abundance of Amphipoda. Our results indicated that taxonomic  
416 evenness should only be compared to other dipnet samples and dipnets likely underestimate the  
417 evenness of the invertebrate community being studied.

418 We recommend sampling quantitatively (e.g., Hess) for aquatic invertebrate  
419 biomonitoring studies when streams are wadeable. In our study, Hess samples collected the most  
420 taxa overall, yielded an intermediate HBI value and we expect most closely reflected the natural  
421 community because we sampled natural, benthic features in the stream. A stovepipe core would  
422 likely produce similar results. For sample processing, we recommend collecting replicate  
423 samples in the field, especially when variance is important for detecting changes (e.g., over time  
424 or differences among variables of interest). Generally, composite samples lack the statistical  
425 power to detect changes in variables of interest. Choosing the most appropriate sampling method  
426 paired with processing each replicate individually will provide the most valuable experimental  
427 design in most cases, particularly because replicates can always be electronically combined after  
428 the fact but the reciprocal is not true.

429

#### 430 **Acknowledgments**

431 We thank Katrina Cook, Linda Cooper, Isaac Dority, Heather Hicks, Arielle Johnson, Alexis  
432 Lester, Tresize Tronstad and Sarah Wannemuehler for field and laboratory assistance. Robert  
433 Manasek and James Hill of the National Park Service provided logistical and field support, as  
434 well as the opportunity to work at Agate Fossil Beds National Monument. The project was  
435 supported by the National Park Service. Discussions with Brett Marshall were helpful in  
436 developing the manuscript.

437

438 **Conflict of interest** The authors have no conflict of interest.

439

#### 440 **References**

- 441 Barbour, M. T., Gerritsen, J., Snyder, B. D., & Stribling, J. B. (1999). Rapid bioassessment  
442 protocols for use in streams and wadeable rivers: periphyton, benthic macroinvertebrates  
443 and fish. Washington, D.C.: U.S. Environmental Protection Agency.
- 444 Bates, D., & Maechler, M. (2013). Matrix: sparse and dense matrix classes and methods. R  
445 package version 1.0-12.
- 446 Battle, J. M., Jackson, J. K., & Sweeney, B. W. (2007). Mesh size affects macroinvertebrate  
447 descriptions in large rivers: examples from the Savannah and Mississippi Rivers.  
448 *Hydrobiologia*, 592, 329-343, doi:10.1007/s10750-007-0771-x.
- 449 Bouchard, R. W., Genet, J. A., & Chirhart, J. W. (2014). Does Supplementing Dipnet Samples  
450 with Activity Traps Improve the Ability to Assess the Biological Integrity of  
451 Macroinvertebrate Communities in Depressional Wetlands? *Wetlands*, 34(4), 699-711,  
452 doi:10.1007/s13157-014-0535-0.
- 453 Bradley, D. C., & Ormerod, S. J. (2002). Evaluating the precision of kick-sampling in upland  
454 streams for assessments of long-term change: the effects of sampling effort, habitat and  
455 rarity. *Archiv Fur Hydrobiologie*, 155(2), 199-221.

- 456 Buss, D. F., & Borges, E. L. (2008). Application of Rapid Bioassessment Protocols (RBP) for  
457 benthic macroinvertebrates in Brazil: Comparison between sampling techniques and  
458 mesh sizes. *Neotropical Entomology*, 37(3), 288-295, doi:10.1590/s1519-  
459 566x2008000300007.
- 460 Cairns, J., & Pratt, J. R. (1993). A history of biological monitoring using benthic  
461 macroinvertebrates. In D. M. Rosenberg, & V. H. Resh (Eds.), *Freshwater Biomonitoring  
462 and Benthic Macroinvertebrates* (pp. 10-27). New York, NY: Chapman and Hall.
- 463 Canton, S. P., & Chadwick, J. W. (1983). Aquatic Insect Communities of Natural and Artificial  
464 Substrates in a Montane Stream. *Journal of Freshwater Ecology*, 2(2), 153-158.
- 465 Carey, J., & Keough, M. (2002). The variability of estimates of variance, and its effect on power  
466 analysis in monitoring design. *Environmental Monitoring and Assessment*, 74(3), 225-  
467 241.
- 468 Carter, J. L., & Resh, V. H. (2001). After site selection and before data analysis: sampling,  
469 sorting, and laboratory procedures used in stream benthic macroinvertebrate monitoring  
470 programs by USA state agencies. *Journal of the North American Benthological Society*,  
471 20(4), 658-682.
- 472 De Pauw, N., Roels, D., & Fontoura, A. P. (1986). Use of Artificial Substrates for Standardized  
473 Sampling of Macroinvertebrates in the Assessment of Water-Quality by the Belgian  
474 Biotic Index. *Hydrobiologia*, 133(3), 237-258.
- 475 DiFranco, J. L. (2014). Protocols for sampling aquatic macroinvertebrates in freshwater  
476 wetlands. Maine Department of Environmental Protection, Portland, Maine,  
477 DEPLW0640A-2014.
- 478 Downes, B. J. (2010). Back to the future: little-used tools and principles of scientific inference  
479 can help disentangle effects of multiple stressors on freshwater ecosystems. *Freshwater  
480 Biology*, 55(Supplement 1), 60-79.
- 481 Galat, D. L., Berry, C. R., Peters, E. J., & White, R. G. (2005). Missouri River Basin. In A. C.  
482 Benke, & C. E. Cushing (Eds.), *Rivers of North America* (pp. 427-480). New York, NY:  
483 Elsevier.
- 484 Gillies, C. L., Hose, G. C., & Turak, E. (2009). What do qualitative rapid assessment collections  
485 of macroinvertebrates represent? A comparison with extensive quantitative sampling.  
486 *Environmental Monitoring and Assessment*, 149, 99-112.
- 487 Hamilton, N. (2015). ggtern: An extension to ggplot2, for the creation of ternary Diagrams. (R  
488 package version, 1 ed.).
- 489 Hering, D., Moog, O., Sandin, L., Verdonschot, & P. F. M. (2004). Overview and application of  
490 the AQEM assessment system. *Hydrobiologia*, 516: 1-20.
- 491 Hilsenhoff, W. L. (1987). An improved biotic index of organic stream pollution. *Great Lakes  
492 Entomologist*, 20, 31-39.
- 493 Jackson, J. K., & Fureder, L. (2006). Long-term studies of freshwater macroinvertebrates: a  
494 review of the frequency, duration and ecological significance. *Freshwater Biology*, 51(3),  
495 591-603.
- 496 Johnson, R. K., Wiederholm, T., & Rosenberg, D. M. (1993). Freshwater biomonitoring using  
497 individual organisms, populations, and species assemblages of benthic  
498 macroinvertebrates. In D. M. Rosenberg, & V. H. Resh (Eds.), *Freshwater Biomonitoring  
499 and Benthic Macroinvertebrates* (pp. 40-158). New York, NY: Chapman and Hall.

- 500 Jones, F. C. (2008). Taxonomic sufficiency: The influence of taxonomic resolution on freshwater  
501 bioassessments using benthic macroinvertebrates. *Environmental Reviews*, 16, 45-69,  
502 doi:10.1139/a07-010.
- 503 King, R. S., & Richardson, C. J. (2002). Evaluating subsampling approaches and macro  
504 invertebrate taxonomic resolution for wetland bioassessment. *Journal of the North  
505 American Benthological Society*, 21(1), 150-171, doi:10.2307/1468306.
- 506 Lazorchak, J. M., Klemm, D. J., & Peck, D. V. (1998). Environmental monitoring and  
507 assessment program-surface waters: field operations and methods for measuring the  
508 ecological condition of wadeable streams. US Environmental Protection Agency Report  
509 EPA/620/R-94/004F.
- 510 Legendre, P., & Legendre, L. (1998). *Numerical Ecology*. Amsterdam: Elsevier Science.
- 511 Letovsky, E., Myers, I. E., Canepa, A., & McCabe, D. J. (2012). Differences between kick  
512 sampling techniques and short-term Hester-Dendy sampling for stream  
513 macroinvertebrates. *Bios*, 83(2), 47-55.
- 514 Macanowics, N., Boeing, W. J., & Gould, W. R. (2013). Evaluation of methods to assess benthic  
515 biodiversity of desert sinkholes. *Freshwater Science*, 32(4), 1101-1110.
- 516 McCabe, D. J., Hayes-Pontius, E. M., Canepa, A., Berry, K. S., & Levine, B. C. (2012).  
517 Measuring standardized effect size improves interpretation of biomonitoring studies and  
518 facilitates meta-analysis. *Freshwater Science*, 31(3), 800-812.
- 519 Merritt, R. W., Cummins, K. W., & Berg, M. B. (Eds.). (2008). *An Introduction to the Aquatic  
520 Insects of North America* (4th ed.). Dubuque, IA: Kendall Hunt Publishing.
- 521 Nichols, S. J., & Norris, R. H. (2006). River condition assessment may depend on the sub-  
522 sampling method: field live-sort versus laboratory sub-sampling of invertebrates for  
523 bioassessment. *Hydrobiologia*, 572, 195-213, doi:10.1007/s10750-006-0253-6.
- 524 O'Connor, A. O., Bradish, S., Reed, T. E., Moran, J., Regan, E. C., Visser, M., et al. (2004). A  
525 Comparison of the Efficacy of Pond-Net and Box Sampling Methods in Turloughs – Irish  
526 Ephemeral Aquatic Systems. *Hydrobiologia*, 524(1), 133-144.
- 527 Oksanen, J., Blanchet, F. G., Kindt, R., Legendre, P., Minchin, P. R., O'Hara, R. B., et al. (2013).  
528 Vegan: Community Ecology Package.
- 529 Quinn, G., & Keough, M. (2002). *Experimental design and data analysis for biologist*.  
530 Cambridge, UK: Cambridge University Press.
- 531 R Core Development Team (2013). R: A Language and Environment for Statistical Computing.  
532 Vienna, Austria: R Foundation for Statistical Computing.
- 533 Rosenberg, D. M., & Resh, V. H. (1993a). Introduction to freshwater biomonitoring and benthic  
534 macroinvertebrates. In D. M. Rosenberg, & V. H. Resh (Eds.), *Freshwater Biomonitoring  
535 and Benthic Macroinvertebrates* (pp. 1-9). New York, NY: Chapman and Hall.
- 536 Rosenberg, D. M., & Resh, V. H. (Eds.). (1993b). *Freshwater Biomonitoring and Benthic  
537 Macroinvertebrates*. New York: Chapman and Hall.
- 538 Slavik, K., Peterson, B. J., Deegan, L. A., Bowden, W. B., Hershey, A. E., & Hobbie, J. E.  
539 (2004). Long-term responses of the Kupaaruk River Ecosystem to phosphorus fertilization.  
540 *Ecology*, 85(4), 939-954.
- 541 Smith, D. G. (2001). *Pennak's Freshwater Invertebrates of the United States* (4th ed.). New  
542 York: John Wiley and Sons, Inc.
- 543 Spurgeon, J. J., Stasiak, R. H., Cunningham, G. R., Pope, K. L., & Pegg, M. A. (2014). Status of  
544 native fishes withing selected protected areas of the Niobrara River in western Nebraska.  
545 *Great Plains Research*, 24, 71-78.

- 546 Thien, S. (1979). A flow diagram for teaching texture by feel analysis. *Journal of Agronomic*  
547 *Education*, 8, 54-55.
- 548 Thorp, J. H., & Covich, A. P. (Eds.). (2010). *Ecology and Classification of North American*  
549 *Freshwater Invertebrates* (3rd ed.). New York: Elsevier.
- 550 Tronstad, L. M., & Hotaling, S. (2017). Long-term trends in aquatic ecosystem bioassessment  
551 metrics are not influenced by sampling method: empirical evidence from the Niobrara  
552 River. *Knowledge and Management of Aquatic Ecosystems*, 418(28),  
553 doi:10.1051/kmae/2017020.
- 554 Turner, A. M., & Trexler, J. C. (1997). Sampling aquatic invertebrates from marshes: evaluating  
555 the options. *Journal of the North American Benthological Society*, 16(3), 694-709,  
556 doi:10.2307/1468154.
- 557 US Environmental Protection Agency. (2013). National rivers and streams assessment 2013-  
558 2014: field operations manual-wadeable. (pp. 177). Washington DC: United States  
559 Environmental Protection Agency, Office of Water.
- 560 Vinson, M., & Hawkins, C. P. (1996). Effects of sampling area and subsampling procedure on  
561 comparisons of taxa richness among streams. *Journal of the North American*  
562 *Benthological Society*, 15(3), 392-399.
- 563 Vlek, H. E., Sporka, F., & Krno, I. (2006). Influence of macroinvertebrate sample size on  
564 bioassessment of streams. *Hydrobiologia*, 566, 523-542.
- 565 Waters, T. F. (1969). Sub-sampler for dividing large samples of stream invertebrate drift.  
566 *Limnology and Oceanography*, 14(5), 813-815.
- 567 Wickham, H. (2011). The Split-Apply-Combine Strategy for Data Analysis. *Journal of*  
568 *Statistical Software*, 40, 1-29.

569

570 **Tables:**

571 **Table 1** Water quality and site characteristics measured when Hester-Dendy samplers were  
 572 deployed (July) and when Hester-Dendy, Hess and dipnet samples were collected (August). A  
 573 “B” after the Secchi disk depth indicated that the bottom of the stream was visible and the  
 574 number is the maximum depth at the site. Stream width was measured with emergent vegetation  
 575 excluded. Abbreviations and units include: T<sub>WATER</sub> = water temperature, T<sub>AIR</sub> = air temperature,  
 576 DO = dissolved oxygen, SPC = specific conductivity, and ORP = oxidation-reduction potential.

| <b>Parameter</b>              | <b>Ranch</b> | <b>Middle</b> | <b>East</b> | <b>Ranch</b> | <b>Middle</b> | <b>East</b> |
|-------------------------------|--------------|---------------|-------------|--------------|---------------|-------------|
| Date                          | 18 July      | 18 July       | 19 July     | 19 Aug       | 17 Aug        | 17 Aug      |
| Time                          | 13:50        | 18:00         | 11:15       | 13:15        | 15:30         | 17:15       |
| T <sub>WATER</sub> (°C)       | 23.8         | 21.1          | 21.6        | 21.7         | 21.1          | 22.9        |
| T <sub>AIR</sub> (°C)         | 30           | 28            | 30          | 34           | 36            | 28          |
| DO (% sat.)                   | NA           | NA            | NA          | 107.0        | 98.0          | 107.0       |
| DO (mg/L)                     | NA           | NA            | NA          | 8.0          | 7.3           | 7.9         |
| SPC (µS/cm)                   | 357.2        | 352.4         | 364.9       | 347.2        | 354.4         | 358.6       |
| pH                            | 8.5          | 8.1           | 7.9         | 8.5          | 8.0           | 8.2         |
| ORP (mV)                      | 168.7        | 45.2          | 32.5        | 196.6        | 72.6          | 81.1        |
| Secchi depth (cm)             | 47 (B)       | 82 (B)        | 67 (B)      | 58.5 (B)     | 73 (B)        | 149.0       |
| Max. depth (m)                | 1.6          | 2.7           | 4.0         | 2.2          | 2.4           | 4.9         |
| Width (m)                     | 12.4         | 14.0          | 12.7        | 9.7          | 13.5          | 16.4        |
| Discharge (m <sup>3</sup> /s) | 0.18         | 0.21          | 0.13        | 0.22         | 0.27          | 0.17        |
| Substrate                     | Sand         | Gravel        | Silt        | Sand         | Gravel        | Silt/sand   |

577



578 **Table 2** Invertebrate bioassessment metrics calculated from Hester-Dendy, Hess and dipnet  
 579 samples collected in the Niobrara River. Metrics for Hester-Dendy and Hess samples were  
 580 calculated from replicate samples (i.e., mean metrics  $\pm$  standard error) and composited samples  
 581 (all replicate samples combined for each site and sampler). Dipnet samples were composited in  
 582 the field and therefore no replicate samples are available for comparison.

|                     | REPLICATE       |                 |                 | COMPOSITE    |               |             |
|---------------------|-----------------|-----------------|-----------------|--------------|---------------|-------------|
| <b>Hester-Dendy</b> | <b>Ranch</b>    | <b>Middle</b>   | <b>East</b>     | <b>Ranch</b> | <b>Middle</b> | <b>East</b> |
| Richness            | 11 $\pm$ 0.75   | 17 $\pm$ 0.77   | 19 $\pm$ 0.80   | 14           | 24            | 29          |
| Diversity           | 1.80 $\pm$ 0.13 | 1.90 $\pm$ 0.07 | 1.89 $\pm$ 0.11 | 3.37         | 3.37          | 3.41        |
| Evenness            | 0.78 $\pm$ 0.04 | 0.69 $\pm$ 0.02 | 0.65 $\pm$ 0.03 | 1.28         | 1.06          | 1.01        |
| EPT richness        | 5.4 $\pm$ 0.24  | 4.0 $\pm$ 0.55  | 4.8 $\pm$ 0.58  | 6            | 6             | 8           |
| No. EPT/No. taxa    | 0.53 $\pm$ 0.01 | 0.25 $\pm$ 0.02 | 0.26 $\pm$ 0.03 | 0.43         | 0.25          | 0.28        |
| HBI                 | 3.9 $\pm$ 0.44  | 5.3 $\pm$ 0.17  | 6.4 $\pm$ 0.11  | 4.0          | 5.3           | 6.4         |
| <b>Hess</b>         | <b>Ranch</b>    | <b>Middle</b>   | <b>East</b>     | <b>Ranch</b> | <b>Middle</b> | <b>East</b> |
| Richness            | 10 $\pm$ 1.86   | 24 $\pm$ 2.5    | 19 $\pm$ 1.8    | 19           | 41            | 34          |
| Diversity           | 1.66 $\pm$ 0.41 | 2.00 $\pm$ 0.13 | 2.22 $\pm$ 0.14 | 2.24         | 3.64          | 3.80        |
| Evenness            | 0.73 $\pm$ 0.14 | 0.65 $\pm$ 0.03 | 0.46 $\pm$ 0.03 | 0.76         | 0.98          | 1.08        |
| EPT richness        | 2.4 $\pm$ 0.40  | 3.0 $\pm$ 0.32  | 1.6 $\pm$ 0.40  | 4            | 4             | 4           |
| No. EPT/No. taxa    | 0.26 $\pm$ 0.03 | 0.14 $\pm$ 0.02 | 0.08 $\pm$ 0.01 | 0.21         | 0.10          | 0.12        |
| HBI                 | 5.4 $\pm$ 0.20  | 6.5 $\pm$ 0.45  | 6.8 $\pm$ 0.16  | 5.1          | 6.5           | 6.8         |
| <b>Dipnet</b>       | <b>Ranch</b>    | <b>Middle</b>   | <b>East</b>     | <b>Ranch</b> | <b>Middle</b> | <b>East</b> |
| Richness            | -               | -               | -               | 20           | 20            | 12          |
| Diversity           | -               | -               | -               | 2.31         | 1.79          | 0.69        |
| Evenness            | -               | -               | -               | 0.77         | 0.60          | 0.27        |
| EPT richness        | -               | -               | -               | 6            | 3             | 2           |
| No. EPT/No. taxa    | -               | -               | -               | 0.30         | 0.15          | 0.17        |
| HBI                 | -               | -               | -               | 5.7          | 6.7           | 7.7         |

583

## Figures

**Fig. 1** We sampled three sites along the Niobrara River at Agate Fossil Beds National Monument in Nebraska, USA. The black line is the Monument boundary and the transparent white areas are private land within the Monument. The inset shows the location of Agate Fossil Beds National Monument in Nebraska (star).

**Fig. 2** Proportions of insects (a), non-insect invertebrates (b), Annelida (c), Ephemeroptera (d), Odonata (e) and Trichoptera (f) in dipnet, Hess and Hester-Dendy (HD) samples that were composited (grey boxes) or kept separate as replicates (white boxes; HD and Hess only) collected from the Niobrara River, Nebraska, USA. Black circles are mean values, bold lines are median values, lower and upper limits are the 25<sup>th</sup> and 75<sup>th</sup> percentiles and whiskers indicate the lower and upper limits of the data.

**Fig. 3** Comparisons of invertebrate assemblages recovered by (a) sampling method and (b) site with non-metric multidimensional scaling (NMDS). Collected assemblages differed with sampling method but not site. HD = Hester-Dendy.

**Fig. 4** Distribution of taxa recovered by Hess, Hester-Dendy and dipnet sampling in the Niobrara River. The position of a given point indicates the percentage of the associated taxon with each sampling method. Circle size indicates the relative abundance of each taxon overall.

**Fig. 5** (a) Richness, (b) diversity, (c) evenness, (d) Ephemeroptera, Plecoptera and Trichoptera (EPT) richness, (e) proportion of EPT taxa and (f) Hilsenhoff's biotic index (HBI) calculated from dipnet, Hester-Dendy (HD) and Hess samples for this study. Metrics calculated from composited samples are in grey and those calculated from five replicate samples are in the white boxes. For all metrics, except HBI, higher values indicate better ecosystem quality. Black circles represent mean values and bold lines are median values, lower and upper edges of the box are the 25<sup>th</sup> and 75<sup>th</sup> percentiles and whiskers indicate the lower and upper limits of the data.

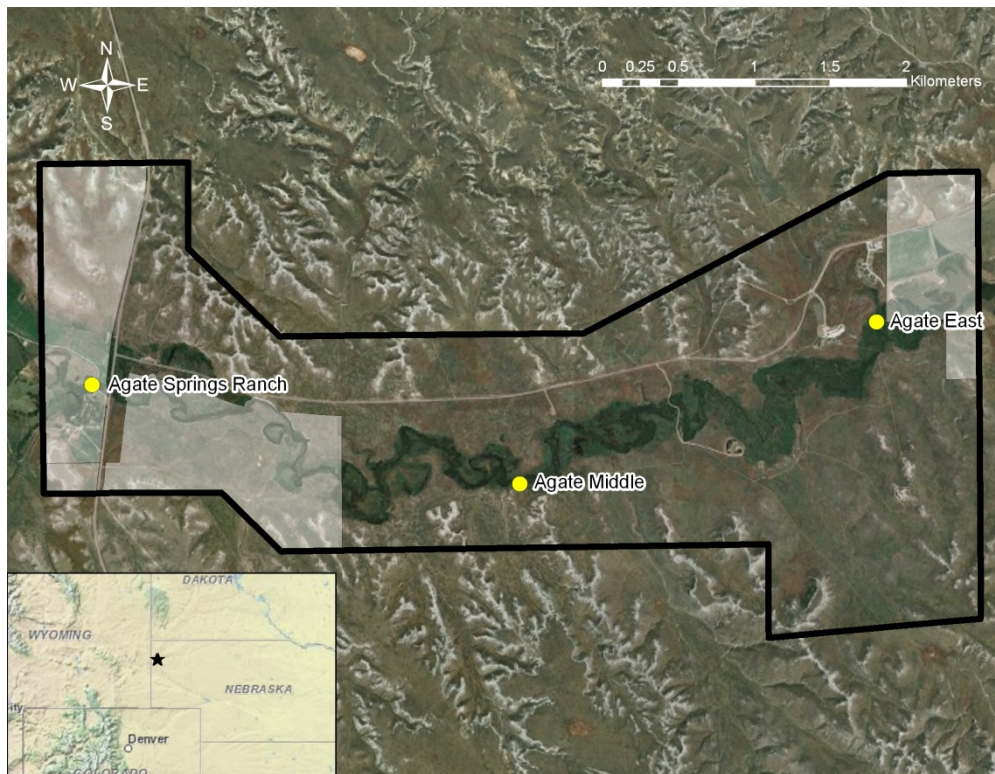

**Fig. 1**

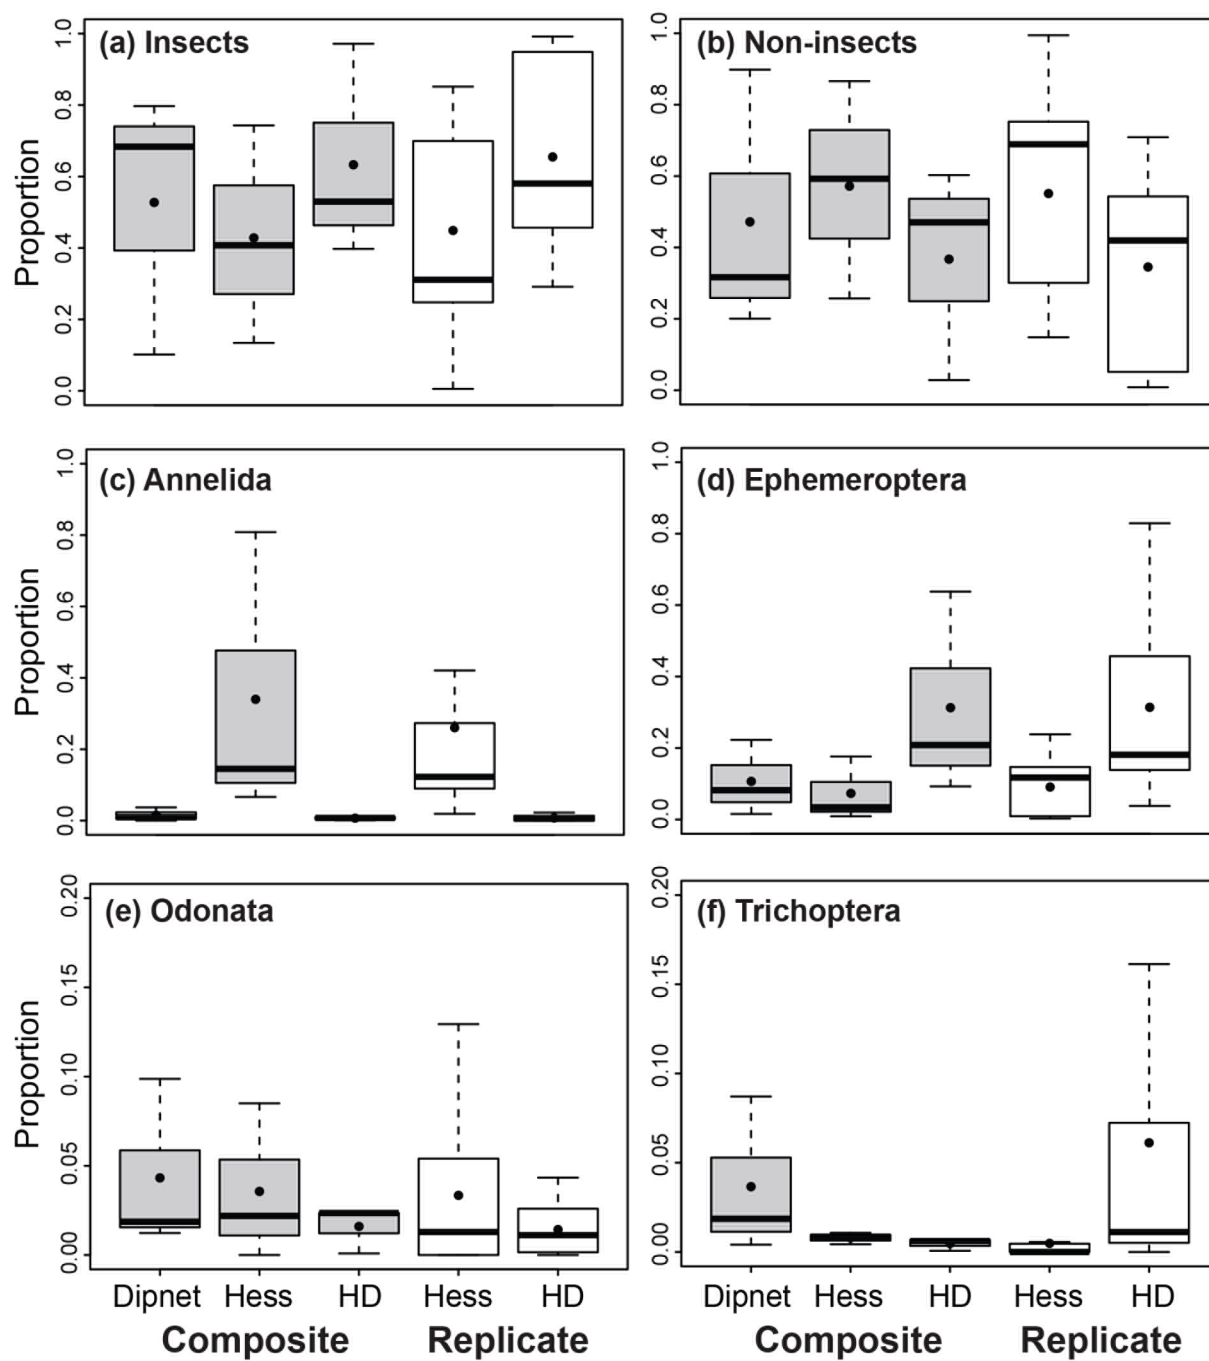

Fig. 2

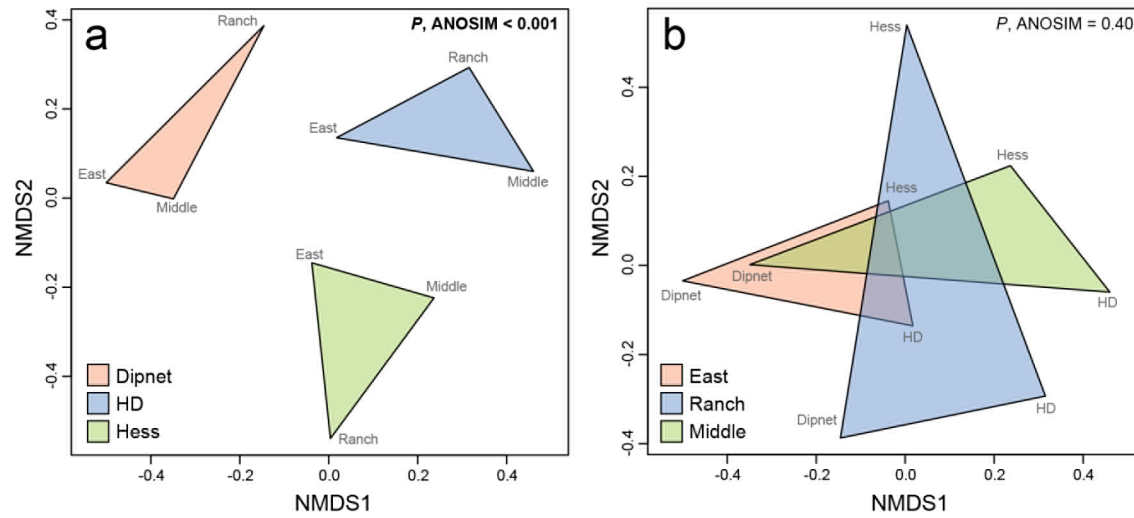

**Fig. 3**

## Taxa by treatment

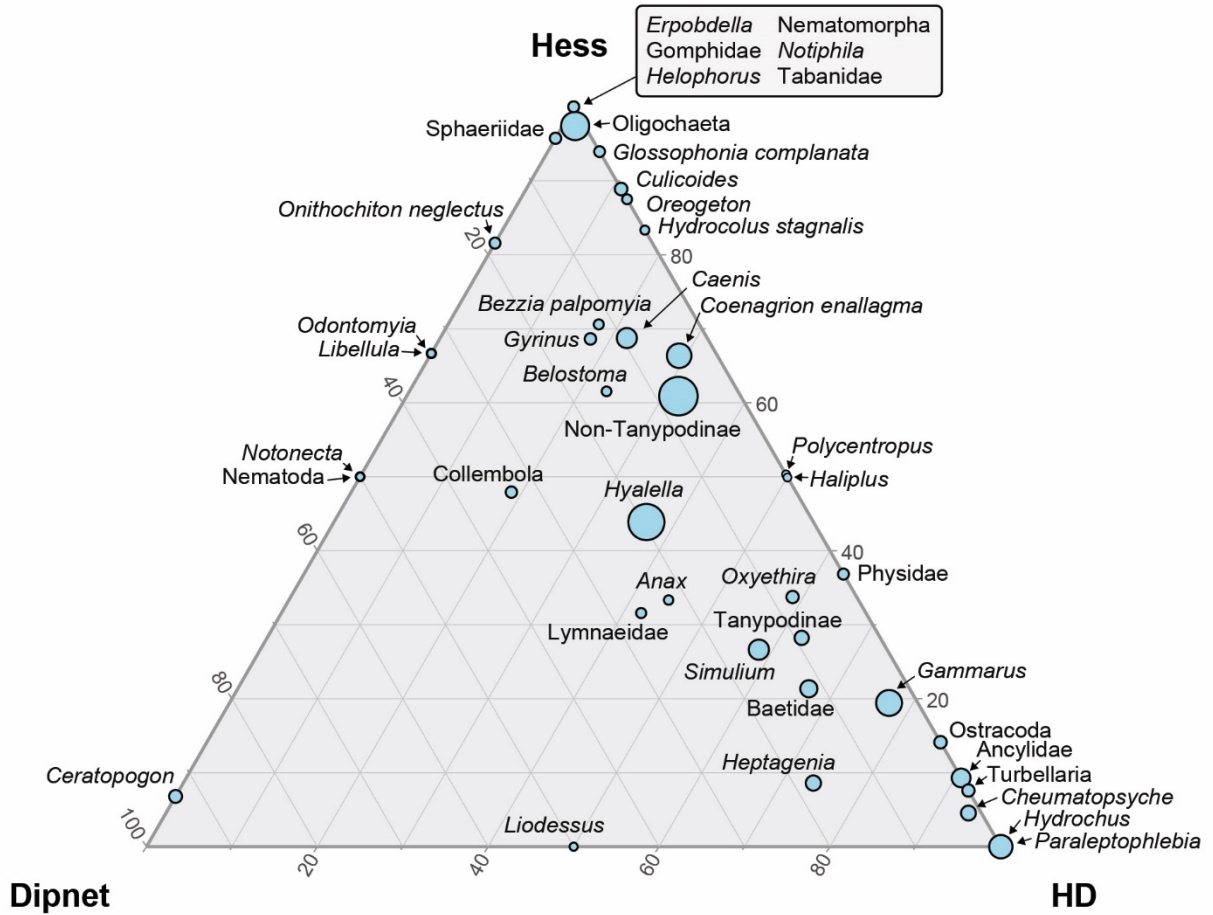

Fig. 4

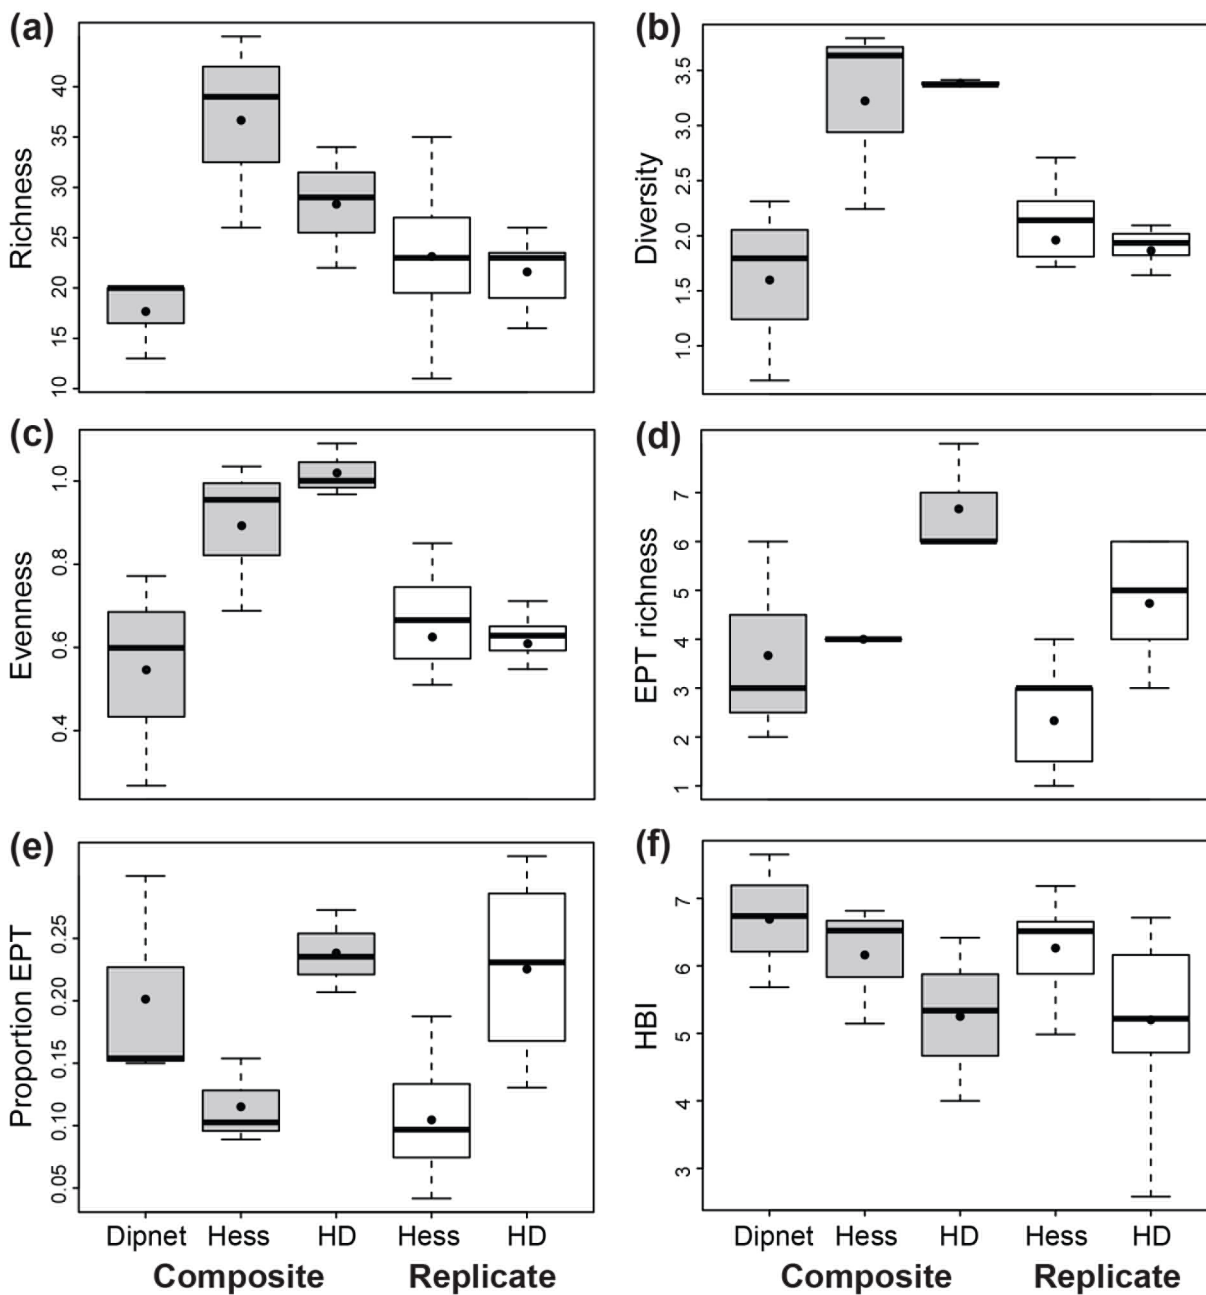

Fig. 5
